# Supplementary material for: Gd–Sn alloys and Gd–Sn–graphene composites as anode materials for lithium-ion batteries
Source: Royal Society of Chemistry journal article supplement (doi:10.1039/c7nj01465a), 2017-01-01
Supplement: c7nj01465a1.pdf [file c7nj01465a1.pdf]

## Supporting information for

### Gd-Sn alloy and Gd-Sn-graphene composites as anode materials for lithium-ion batteries

Qigang Han,<sup>abc</sup> Zheng Yi,<sup>abc\*</sup> Yong Cheng,<sup>b</sup> Yaoming Wu<sup>b</sup> and Limin Wang<sup>b\*</sup>

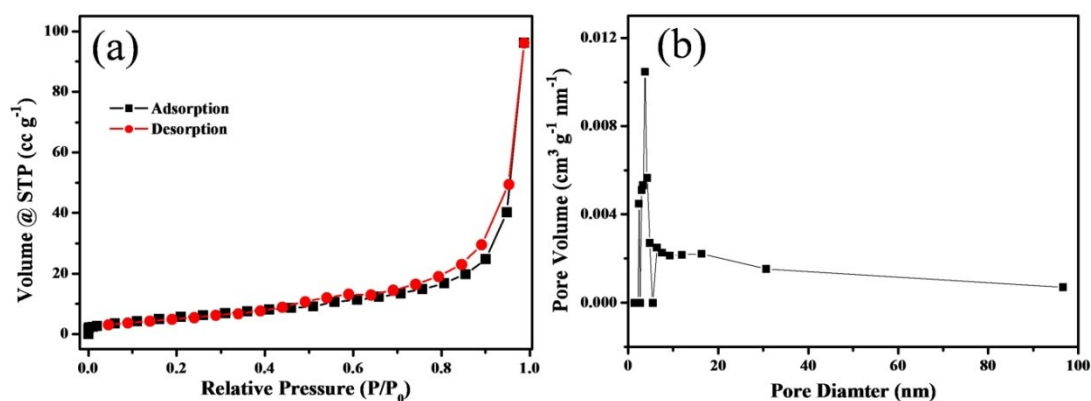

**Fig. S1.** (a) The N<sub>2</sub> adsorption-desorption and (b) corresponding pore size distribution curve of the GdSn<sub>6</sub>/Graphene composite.

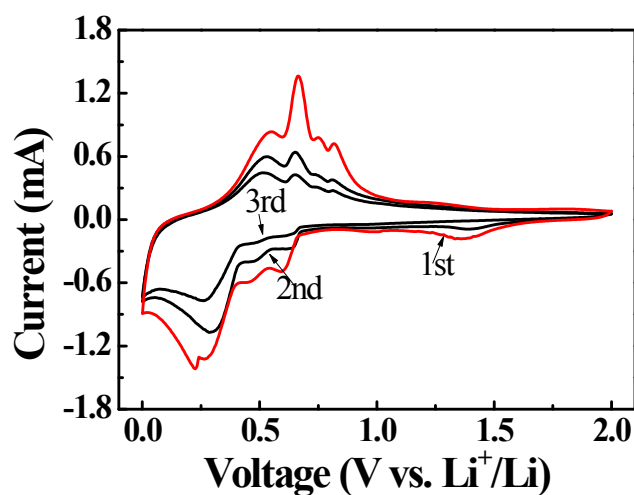

**Fig.S2.** The CV curves of pure Sn electrode.

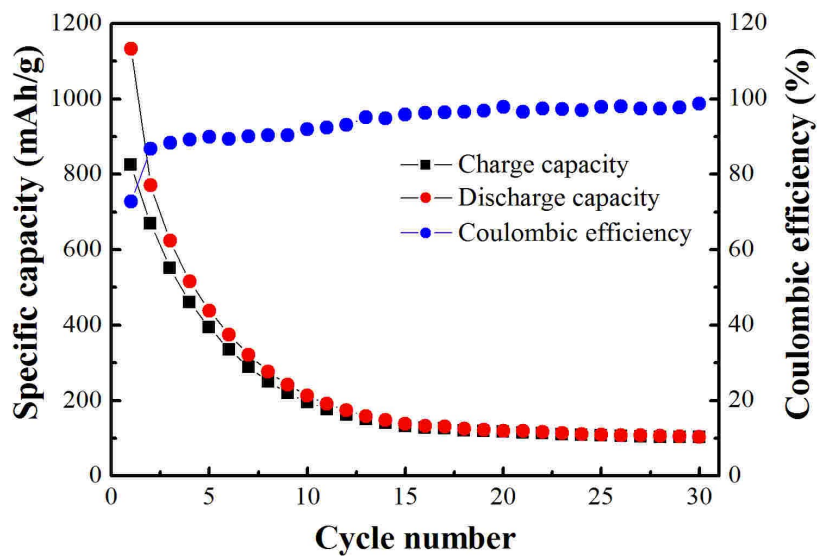

Fig.S3 The charge/discharge capacity and columbic efficiency of the pure Sn.

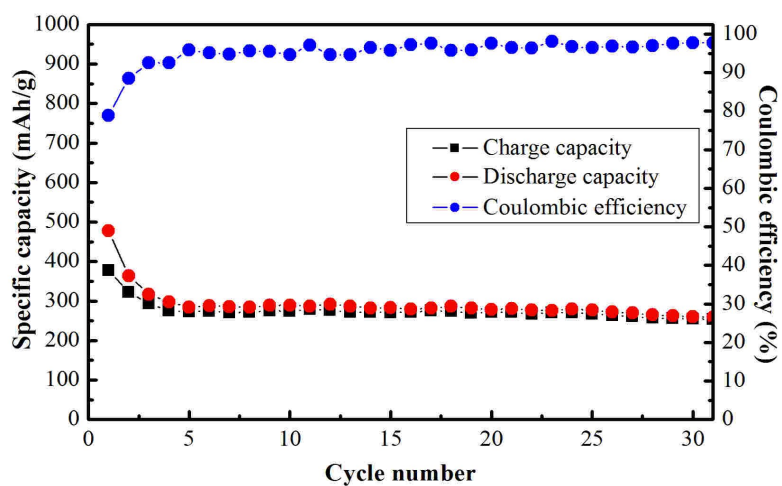

Fig.S4 The charge/discharge capacity and columbic efficiency of the graphene.
